# Supplementary material for: QTLs and Candidate Genes Associated with Semen Traits in Merino Sheep
Source: MDPI journal article supplement (doi:10.3390/ani13142286), 2023-07-12
Supplement: s1 [file s1]

**Supplementary Table S1:** Significance of fitted effects for each semen volume, gross motility, concentration, and percent post-thaw motility

|                   | Volume | Gross Motility | Concentration | Percent Post-Thaw Motility |
|-------------------|--------|----------------|---------------|----------------------------|
| Age at collection | ***    | ***            | ***           | ***                        |
| Collection centre | ***    | ***            | ***           | ***                        |
| Collection number | ***    | ***            | NS            | NS                         |
| Breed season      | ***    | *              | ***           | **                         |
| Collection method | NS     | **             | NS            | ***                        |

Note: \*\*\* = (p < 0.001), \*\* = (p < 0.01), \* = (p < 0.05), and NS = (p > 0.05)

**Supplementary Table S2:** Uncharacterised genes associated with in each QTL identified in semen volume, gross motility, concentration, and percent post-thaw motility.

| Trait          | QTL Region (OAR:Mb) | Candidate Gene Symbol                                                                                                                                           |
|----------------|---------------------|-----------------------------------------------------------------------------------------------------------------------------------------------------------------|
| Volume         | 3:8.41-9.41         | <i>LOC105612588, LOC105612590, LOC105612594, LOC105612621</i>                                                                                                   |
|                | 5:35.1-36.1         | <i>LOC105615251, LOC101116567, LOC105615252, LOC105613755, LOC105613754, LOC105611543, LOC105611545, LOC105611544, LOC101119981, LOC105611546, LOC105611547</i> |
|                | 9:53.15-54.15       | <i>LOC105613955</i>                                                                                                                                             |
|                | 10:43.98-44.98      | <i>LOC101121784</i>                                                                                                                                             |
|                | 11:24.88-25.88      | <i>LOC105610742, LOC105616326, LOC105616457, LOC105616327</i>                                                                                                   |
|                | 12:47.91-48.91      | <i>LOC105616533, LOC101103167, LOC105609714, LOC105609715, LOC105609719, LOC105616534, LOC101121791, LOC105616535, LOC101123057</i>                             |
|                | 12:50.08-51.08      | <i>LOC101111210, LOC105616539, LOC105616540, LOC101110432, LOC105616541, LOC105616542, LOC105616543, LOC105610224, LOC105616544</i>                             |
|                | 25:7.12-8.12        | <i>LOC105604913, LOC101113195, LOC105604914, LOC101113650, LOC105604915, LOC105604917, LOC105604916, LOC105604918</i>                                           |
|                | 25:30.05-31.05      | <i>LOC105604997, LOC105605080, LOC105605000, LOC105605091, LOC105605001, LOC105605002, LOC105605003</i>                                                         |
| Gross Motility | 2:194.93-195.93     | <i>LOC101122844</i>                                                                                                                                             |
|                | 3:5.68-6.68         | <i>LOC105607238, LOC105612447, LOC105607239, LOC105607240</i>                                                                                                   |
|                | 8:50.32-51.32       | <i>LOC105609780, LOC105611302, LOC105611301, LOC105615880, LOC105611299, LOC105611298</i>                                                                       |
|                | 10:16.12-17.12      | <i>LOC105616140, LOC105608006, LOC105616141, LOC105616142, LOC105616143</i>                                                                                     |

|                            |                 |                                                                                                                                                                                                                                                                                                                                                                                                                      |
|----------------------------|-----------------|----------------------------------------------------------------------------------------------------------------------------------------------------------------------------------------------------------------------------------------------------------------------------------------------------------------------------------------------------------------------------------------------------------------------|
|                            | 14:5.72-6.72    | LOC105616821, LOC105616820, LOC105609368, LOC105616822, LOC105609367, LOC105609365, LOC105616823, LOC105609364, LOC105609363                                                                                                                                                                                                                                                                                         |
|                            | 15:41.71-42.71  | LOC105602253, LOC105602254, LOC105602255, LOC101104267                                                                                                                                                                                                                                                                                                                                                               |
|                            | 24:25.94-26.94  | LOC105604726, LOC105604725, LOC101112443, LOC101112694, LOC105604727, LOC101114075, LOC105604728, LOC105604730, LOC105604731, LOC105604732, LOC101102954, LOC101103208, LOC105604733, LOC105604736, LOC105604735, LOC101122752, LOC105604737                                                                                                                                                                         |
| Concentration              | 2:78.38-79.38   | LOC105608114                                                                                                                                                                                                                                                                                                                                                                                                         |
|                            | 2:220.72-221.72 | LOC105606755, LOC101118589, LOC101115609, LOC105606754, LOC105606772                                                                                                                                                                                                                                                                                                                                                 |
|                            | 2:247.37-248.37 | LOC105611563, LOC105612023, LOC105611566, LOC105611567, LOC105610920, LOC101107939, LOC105610921, LOC105610922                                                                                                                                                                                                                                                                                                       |
|                            | 3:49.45-50.45   | LOC101120736, LOC101120996, LOC654331, LOC101122016, LOC101121246                                                                                                                                                                                                                                                                                                                                                    |
|                            | 5:37.91-38.91   | LOC101112480, LOC105614551, LOC101112729, LOC105615341, LOC105613511, LOC101113495, LOC105613512, LOC101107959, LOC101108225, LOC101113757, LOC101108485, LOC101114017, LOC101114270, LOC101108746, LOC101114521, LOC101109012, LOC101114777, LOC101115031, LOC101115277, LOC101109269, LOC101109535, LOC101115539, LOC101115794, LOC101116054, LOC101116574, LOC101116831, LOC101117077, LOC101117332, LOC101117585 |
|                            | 7:55.45-56.45   | LOC105607297, LOC105615718, LOC105607294, LOC105607293                                                                                                                                                                                                                                                                                                                                                               |
|                            | 20:42.01-43.01  | LOC105603856, LOC105603857, LOC105603859, LOC105603858, LOC105603860, LOC105603861, LOC105603863, LOC105603862                                                                                                                                                                                                                                                                                                       |
|                            | 25:0.24-1.24    | LOC101123180, LOC105604888, LOC105604889, LOC105604890                                                                                                                                                                                                                                                                                                                                                               |
| Percent Post-Thaw Motility | 1:25.28-26.28   | LOC105609503, LOC105605441, LOC105609505, LOC105609934, LOC105609504, LOC105609507, LOC105609506, LOC105610201, LOC105609513, LOC105609508                                                                                                                                                                                                                                                                           |
|                            | 7:48.54-49.54   | LOC105609699, LOC105615709, LOC105609702                                                                                                                                                                                                                                                                                                                                                                             |
|                            | 7:61.59-62.59   | LOC101113241, LOC105615725, LOC105615726, LOC105612095, LOC105615727, LOC105612097, LOC105612096, LOC101112487, LOC101115542, LOC105612098                                                                                                                                                                                                                                                                           |
|                            | 8:76.2-77.2     | LOC105615930, LOC101106779, LOC101104501                                                                                                                                                                                                                                                                                                                                                                             |
|                            | 9:52.92-53.92   | LOC105611155, LOC105611156, LOC105613955                                                                                                                                                                                                                                                                                                                                                                             |
|                            | 9:57.23-58.23   | LOC105616058, LOC105611122, LOC105613108, LOC105611121, LOC105616059, LOC105613105                                                                                                                                                                                                                                                                                                                                   |
|                            | 9:78.58-79.58   | LOC105616083, LOC105616084, LOC105611867, LOC105611866, LOC101107532, LOC105611865                                                                                                                                                                                                                                                                                                                                   |

|  |                |                                                                                                                                                                 |
|--|----------------|-----------------------------------------------------------------------------------------------------------------------------------------------------------------|
|  | 14:3.12-4.12   | <i>LOC105613905, LOC105602052, LOC105609376, LOC105616809, LOC105616810, LOC105616811, LOC105616812</i>                                                         |
|  | 15:13.4-14.4   | <i>LOC105602135, LOC105602134, LOC105602133, LOC105602132, LOC105602131, LOC105602137</i>                                                                       |
|  | 17:22.17-23.17 | -                                                                                                                                                               |
|  | 25:12.85-13.85 | <i>LOC105604934, LOC105604933, LOC105604932, LOC105601946, LOC101118756, LOC105604929, LOC101119276, LOC105605087, LOC101119530, LOC105604935, LOC105604936</i> |

Note: OAR: *Ovis aries* autosome; Mb: Mega base
